# Supplementary material for: Molecular pathways in post-colonoscopy versus detected colorectal cancers: results from a nested case-control study
Source: bioRxiv or medRxiv preprint supplement (doi:10.1101/2021.06.28.21259642), 2021-07-01
Supplement: Supplementary file [file media-1.pdf]

# Supplementary data

## PCCRCs

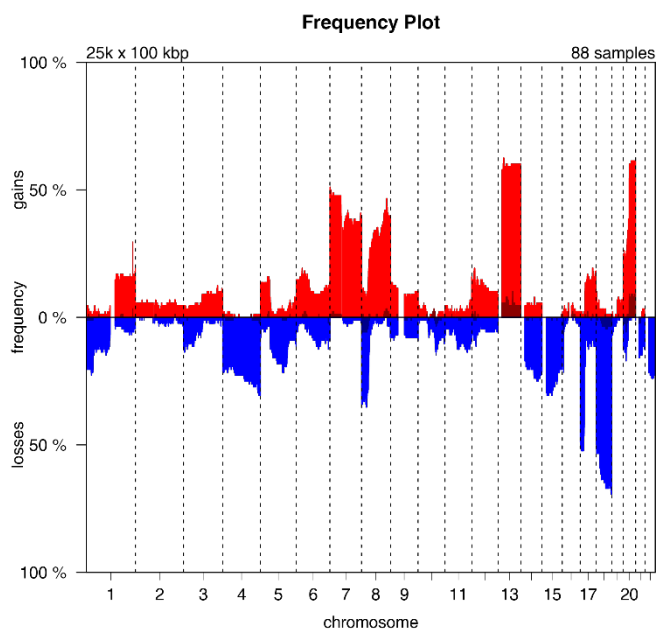

## DCRCs

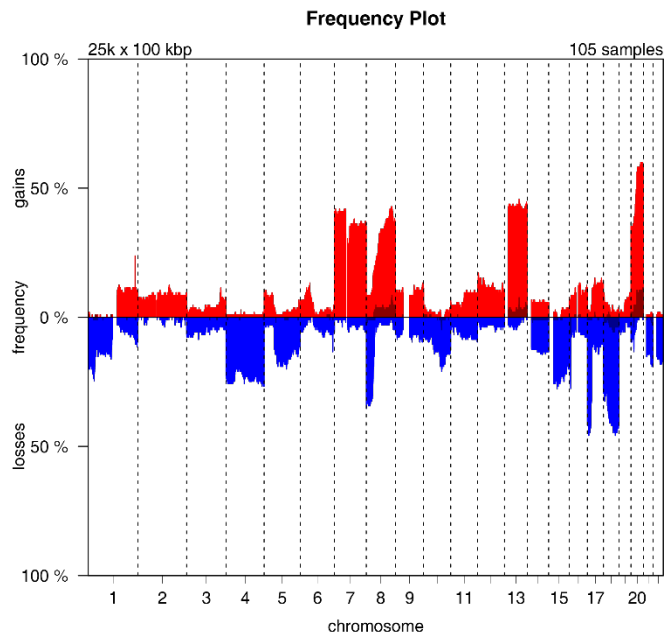

Supplementary Figure 1: PCCRCs and DCRCs frequency plots of DNA copy number gains and losses

throughout the whole genome. Red: gains, blue: losses.

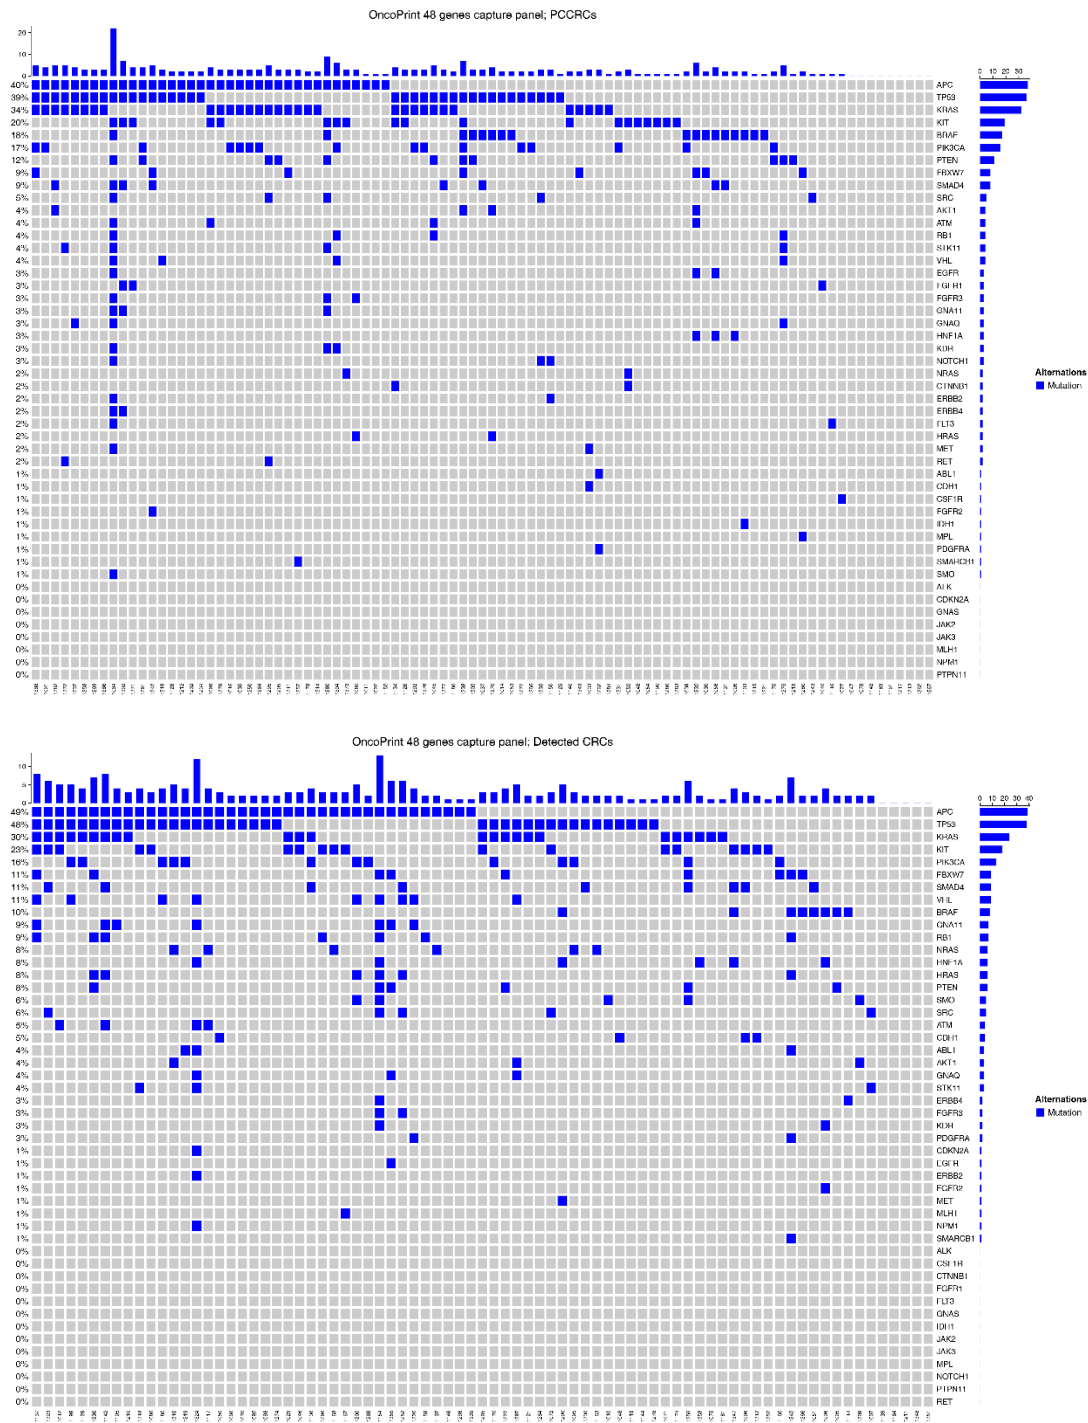

Supplementary Figure 2: Mutation frequencies detected in PCCRCs and DCRs. Oncoprint matrix showing the 48 tested genes (rows) in CRC cases (columns). Blue coloured block: mutations detected; grey coloured block: no mutation detected. Top panel: results of PCCRCs; lower panel: results DCRs.

Supplementary Table 1: Comparison of baseline characteristics between CRC cases with and without missing data. CCA: complete case analysis; \*Size is missing in 4 cases.

| Characteristic                            | CCA (n=162) | Imputed cases (n=58) | p-value |
|-------------------------------------------|-------------|----------------------|---------|
| PCCRC (%)                                 | 89 (54.9)   | 33 (56.9)            | 0.918   |
| Mean age in years (SD)                    | 71.0 (10.4) | 70.0 (9.7)           | 0.499   |
| Mean CRC size in cm (SD)                  | 4.07 (1.88) | 4.05 (1.99)          | 0.959   |
| Gender (% male)                           | 93 (57.4)   | 34 (58.6)            | 0.996   |
| Location CRC (% proximal)                 | 85 (52.5)   | 23 (40.4)            | 0.156   |
| Morphology (% flat)                       | 66 (41.3)   | 19 (32.8)            | 0.328   |
| TNM stage (% T1)                          | 18 (11.1)   | 8 (14.5)             | 0.662   |
| CRC differentiation (% good/intermediate) | 119 (77.8)  | 39 (79.6)            | 0.945   |
| Mucinosity (% >50% present)               | 19 (11.7)   | 11 (19.0)            | 0.248   |

Supplementary Table 2a+b: Comparison of branches of the hierarchical clustering analysis. \*Chi-square test used to compare whether PCCRC rates were different between branches. \*\* Chi-square test used to compare whether the subset biological PCCRC was different among branches.

A)

| Branch    | PCCRC (55.5%) | Biological PCCRC (42.7%) | Procedural PCCRC (12.7%) | Proximal location | Nonpolypoid |
|-----------|---------------|--------------------------|--------------------------|-------------------|-------------|
| 1 (n=50)  | 31 (62.0%)    | 24 (48.0%)               | 7 (14.0%)                | 31 (62.0%)        | 24 (49.0%)  |
| 2 (n=56)  | 38 (67.9%)    | 30 (53.6%)               | 8 (14.3%)                | 37 (66.1%)        | 25 (44.6%)  |
| 3 (n=114) | 53 (46.5%)    | 40 (35.1%)               | 13 (14.3%)               | 40 (35.4%)        | 36 (31.9%)  |
|           | P=0.018*      | P=0.084**                |                          | P<0.001*          | P=0.073*    |

B)

| Branch    | MSI        | CIMP high  | BRAF       | KRAS       | 13q gain   | 17p loss   | 18q loss   |
|-----------|------------|------------|------------|------------|------------|------------|------------|
| 1 (n=50)  | 1 (2.0%)   | 50 (100%)  | 10 (25.6%) | 13 (33.3%) | 30 (63.8%) | 21 (44.7%) | 33 (70.2%) |
| 2 (n=56)  | 31 (56.4%) | 34 (60.7%) | 15 (31.9%) | 6 (12.8%)  | 8 (15.7%)  | 1 (2.0%)   | 2 (3.9%)   |
| 3 (n=114) | 3 (2.7%)   | 9 (7.9%)   | 0 (0.0%)   | 37 (43.0%) | 74 (77.9%) | 65 (68.4%) | 78 (82.1%) |
